1 L-lactic and 2-ketoglutaric acids, odors from human skin, govern attraction and landing  
2 in host-seeking female *Aedes aegypti* mosquitoes

3  
4 Benjamin D. Sumner · Brogan A. Amos<sup>1</sup> · Jan E. Bello<sup>2</sup> · Ring T. Cardé  
5 Department of Entomology  
6 University of California, Riverside  
7 Riverside, California, USA

8  
9  
10 1. Present address: Australian Institute of Tropical Health and Medicine, James Cook University, QLD,  
11 4878, Australia

12 2. Present address: Provivi Inc, 1401 Colorado Ave, Santa Monica, CA 90404, USA  
13

14

15

16

17

18 **Keywords** carbon dioxide, Culicidae, wind tunnel, 2-hydroxypropanoic acid, 2-  
19 oxopentanedioic acid

20

21

22 **Abstract**

23

24 *Aedes aegypti*, presented with a source of L-lactic and 2-ketoglutaric acid in a wind-

25

26 tunnel bioassay, takeoff, fly upwind, and land on the blend at rates comparable those

27

28 exhibited by mosquitoes presented with a skin odor stimulus. Addition of carbon dioxide

29

30 decreased takeoff latency but was not required to elicit upwind flight nor landings.

31

32 Ketoglutaric acid, a recently identified component of human skin odor, combined with

33

34 lactic acid elicits the full repertoire of mosquito host-seeking behaviors.

35

36

37 **Introduction**

38

39 *Aedes aegypti* (Diptera: Culicidae) is a vector of several consequential arboviruses

40

41 including chikungunya, dengue, yellow fever, and Zika. *Aedes aegypti* has invaded much

42

43 of the tropics and sub-tropics, making dengue the most prevalent human arbovirus,

44

45 infecting 100 million per year and placing nearly half of the world's population at risk

46

47 (Bhatt et al. 2013).

37 Females of the anthropophilic form of *Ae. aegypti* blood feed almost exclusively  
38 on humans (Scott et al. 1993). This makes them particularly effective vectors of human  
39 pathogens (MacDonald 1952). The cosmopolitan “subspecies” *Ae. aegypti aegypti*  
40 diverged from the non-human preferring *Ae. aegypti formosus*, 400 to 550 years ago  
41 (Gloria-Soria et al. 2016; Crawford et al. 2017; Powell et al. 2018). Hereafter references  
42 to *Ae. aegypti* are to the anthropophilic Orlando strain of *Ae. a. aegypti*.

43 To find a host, *Ae. aegypti* fly upwind when they detect fluctuating levels of CO<sub>2</sub>  
44 above ambient concentration. Once they are within several meters of a prospective host,  
45 they can also sense visual cues and, even closer to the host, thermal cues (Gillies 1980;  
46 Cardé and Gibson 2010; van Breugel et al. 2015; Cardé 2015; Sumner and Cardé 2022).  
47 The precise distances at which they detect and use host odors other than CO<sub>2</sub> is  
48 unresolved (Gillies and Wilkes 1970; Dekker et al. 2005).

49 For *Ae. aegypti*, humans are distinguished from other potential hosts by their skin  
50 odor (Steib et al. 2001; Dekker et al. 2002; McBride et al. 2014). Bernier et al. (2002)  
51 characterized 279 compounds in the headspace above human skin. A review by Dormont  
52 et al. (2021) provides a valuable table of mosquito attractants using Dethier et al.’s (1960)  
53 definition of attractant as “a chemical which causes insects to make oriented movements  
54 towards its source.” Their list of compounds is organized by species, “co-tested”  
55 compounds, and assay type. A challenge is to determine which compounds or  
56 combinations of compounds elicit host-finding behaviors. This task is complicated by  
57 how different bioassays measure different components of mosquito host-seeking  
58 behavior. “Attractiveness” in one assay may measure flying into a port from a still-air  
59 chamber, whereas in another, it may measure arrestment after upwind orientation (Cardé  
60 2022). Most assays measure attraction by the responder reaching an endpoint of  
61 orientation over a set interval.

62 Intermediate steps in orientation also can be monitored. Dekker et al. (2001) in a  
63 still-air, port -entry assay and Torr et al. (2008) in a field trapping study used  
64 electrocution grids to show that some host odors can lure mosquitoes to the vicinity of the  
65 odor source but do not always elicit port or trap entry, respectively. The reasons for such  
66 outcomes may relate to the odors being incomplete or containing some antagonistic  
67 compounds. Alternatively, the odor plume's structure may be suboptimal for orientation  
68 (Geier et al. 1999; Dekker et al. 2001). Another metric to monitor is the rapidity of  
69 orientation. Dekker et al. (2001) documented the time to either electrocution or port  
70 entry, showing that some odor blends induced more rapid orientation than others, but if  
71 the assay's duration was extended to 15 min, this difference faded. Kennedy (1977)  
72 discussed the importance of the assay's duration in its outcome and the limitation of  
73 endpoint assays in distinguishing undirected movement (kinesis) from directed  
74 movement (taxis).

75 Nonetheless, laboratory endpoint assays are useful for investigations of mosquito  
76 responses to host emitted odors. For example, BG-Lure, a human skin-odor mimic,  
77 designed for use with the Biogents Sentinel® trap (Biogents, Regensburg, Germany),  
78 releases lactic acid, ammonia, and hexanoic acid. This lure was developed using a Y-tube  
79 olfactometer with subsequent field-trapping studies (Williams et al. 2006).

80 Lactic acid (2-hydroxypropanoic acid) is thought to be a diagnostic cue used by  
81 *Ae. aegypti* (Steib et al. 2001) and *An. gambiae* (Dekker et al. 2002) to distinguish  
82 humans from non-human animals. The addition of lactic acid made non-human animal  
83 odor more attractive to both species of anthropophilic mosquitoes. Both studies found  
84 lactic acid, however, was necessary but insufficient by itself to attract the number of *Ae.*  
85 *aegypti* that were attracted to human odor. Smith et al. (1970) tested *Ae. aegypti* in a  
86 combined port entry and landing assay. They found that lactic acid reduced landing on a

87 human-worn sock, but increased olfactometer trap catch downwind of the sock,  
88 suggesting that the dose of lactic acid reaching the mosquito is important. Healy and  
89 Copland (2000) found that *An. gambiae* did not land on a lactic acid source. However,  
90 Dekker et al.'s (2002) findings, lactic acid may be an attractant but not a landing cue for  
91 *An. gambiae*.

92         Recently, Bello and Cardé (2022) identified 2-ketoglutaric acid (2-  
93 oxopentanedioic acid) in human skin odor and demonstrated that a mixture of lactic and  
94 ketoglutaric acids in the presence of CO<sub>2</sub> is a landing cue for *Ae. aegypti*. The addition of  
95 pyruvic acid, also present in the active fraction of skin odor (Bello and Cardé 2022), to  
96 this mixture did not significantly elevate landing rates above those elicited by a blend of  
97 lactic and ketoglutaric acids.

98         Carbon dioxide added to ambient air (which has an intrinsic concentration of CO<sub>2</sub>  
99 of about 0.4%), increases the takeoff rate of *Ae. aegypti* (Daykin et al. 1965), elicits  
100 upwind flight (Kennedy 1940), increases heat-seeking (McMeniman et al. 2014), and  
101 ultimately leads to increased endpoint capture (Huffaker and Back 1943. In a generally  
102 accepted model of mosquito host seeking, formalized by Gillies in 1980, CO<sub>2</sub> is generally  
103 considered as the long-range attractant of host-seeking mosquitoes. The model assumes a  
104 mosquito detects CO<sub>2</sub>, takes off, flies upwind along the plume, and then switches to other  
105 host cues. Dekker et al. (2005) found that diluted human skin odor was less attractive to  
106 *Ae. aegypti* than undiluted skin odor and that CO<sub>2</sub> sensitizes mosquitoes to other host  
107 odors. These models were updated by Cardé and Gibson (2010), van Breugel et al.  
108 (2015), and Cardé (2015), but still posit that CO<sub>2</sub> was the long-distance attractant, and  
109 that as mosquitoes fly closer to their hosts they would switch to using specific cues such  
110 as skin odor.

111 This paradigm may not hold for other mosquitoes. Schreck et al. (1972) found  
112 that *Anopheles quadriannulatus* flew to a calf from further distances than to a calf-  
113 equivalent quantity of CO<sub>2</sub>. It is unknown how far downwind the lactic and ketoglutaric  
114 acids are detectable by *Ae. aegypti*. Additionally, it is not known whether there are  
115 characteristic behaviors, such as surging upwind or casting crosswind, associated with the  
116 detection and subsequent attraction to the landing cue compounds

117 As the blend of lactic and ketoglutaric acids elicited landing in a cage assay (Bello  
118 and Cardé 2022), we set out to determine if the blend elicits upwind flight in a wind  
119 tunnel in the presence or absence of CO<sub>2</sub>. We used wind-tunnel assays with videography  
120 allow examination of orientation maneuvers, in addition to landing (Lacey and Cardé  
121 2011). Some wind-tunnel assays have used video tracking without landing counts (van  
122 Breugel et al. 2015); however, landing is the ultimate measure of successful orientation to  
123 a host. If a mosquito does not land, it cannot bite nor transmit pathogens (Reed et al.  
124 1900). We measured time from release to takeoff, time from takeoff to the first landing  
125 on the odor source, the number of landings, and the duration of landings. Our video  
126 tracking system allowed us to examine mosquito flight maneuvers prior to landing.

127

## 128 **Materials and Methods**

129

### 130 **Mosquito Rearing**

131

132

133 An Orlando strain colony of *Ae. aegypti* was maintained in a L:D 14:10 h photocycle at  
134 27 °C and 70 % RH. Approximately 50 larvae were reared in plastic containers (26 x  
135 25.6 x 15 cm) with ~1 cm of deionized (D.I.) water and fed Tetramin® pellets (Tetra,  
136 Blacksburg, VA, U.S.A). Pupae were held in plastic containers, transferred to screen

137 cages (30 x 30 x 30 cm, BugDorm-1, Megaview Science Co. Ltd. Talchung, Taiwan)  
138 before eclosion. Mosquitoes were provided 10 % sucrose solution in D.I. water on a  
139 cotton wick. Males and females were held together in the screen cages, and females used  
140 in the bioassays were assumed to have mated. Females used in experiments were 3-10  
141 days post-eclosion and were not blood fed. Mosquitoes were starved and deprived of  
142 water approximately 12 hours prior to experiments. Female mosquitoes were transferred  
143 individually to clean cylindrical acrylic release cages (7 × 8 cm diameter) 30 minutes  
144 prior to testing; assays were conducted 4-8 h into their photophase.

145

#### 146 **Assay Methods**

147

148 The assay methods were adapted from Sumner and Cardé (2022). The flight and landing  
149 of mosquitoes were released in a glass wind tunnel 122 × 30.5 × 30.5 cm and were video  
150 recorded (FDR-AX53, Sony, Tokyo, Japan) from above. Air was drawn into the tunnel  
151 from an adjacent, uninhabited room (25 °C and 70 % RH). To simulate the presence of an  
152 upwind vertebrate host, 100 ml/minute of 4 % CO<sub>2</sub> mixed with tank air (equivalent to  
153 1/60 of the exhalation a human, Snow 1970), was carried to the wind tunnel via a 3-m-  
154 long Tygon® tube, ensuring temperature equilibration (Pinto et al. 2001). The tube was  
155 connected to an L-shaped glass tube (OD 5.5 mm, ID 3.5 mm) that descended 15 cm  
156 from the ceiling of the tunnel and extended 20 cm downwind to 60 cm upwind from the  
157 release cage. The 4 % CO<sub>2</sub> mix exited at ~0.4 m/s but produced no detectable difference  
158 in wind speed (Omega HHF 52 anemometer, Omega Engineering, Inc., Stamford, CT,  
159 USA) nor a temperature difference (to within 0.1 °C) 1 cm downwind of the release  
160 point. The CO<sub>2</sub> release tube was centered so that the generated plume of CO<sub>2</sub> passed over

161 the beads treated with skin odor and then to the release cage. In trials without the addition  
162 of CO<sub>2</sub>, tank air was supplied at the same rate through the same equipment.

163 The assay room was maintained at 27 °C and 60 % RH. Illumination for  
164 videography was provided by infrared LED lights (AXIS T90A, 850 nm, Axis  
165 Communications AB, Lund, Sweden) mounted behind a stainless-steel screen at the  
166 downwind end of the tunnel as well as beside the wind tunnel. The infrared light in the  
167 camera was turned off to avoid glare. Visible light was provided by incandescent bulbs  
168 and measured at ~14 lux inside the tunnel.

169 Treatments were presented on glass beads (black, 10/0 Czech Glass Seed,  
170 approximately 2 mm OD toroidal, Precosia Ornela, Zásada, Czech Republic) placed in a  
171 clean glass Petri dish (7 cm diameter). Negative control beads are hereafter called clean  
172 beads. The blend components, ketoglutaric acid (“KGA” in the figures) (0.5 ml; 10 µl/ml  
173 or 100µl/ml in acetone) and lactic acid (“LA” in the figures) (0.5 ml; 10 µl/ml or  
174 100µl/ml in acetone) were applied in a dropwise spiral to beads. As Ghaninia et al.  
175 (2019) found that acetone was attractive in a flight tube to *Ae. aegypti*, the beads were  
176 placed under a fume hood for 10 minutes to ensure that the acetone had evaporated.

177 Human skin odor was collected onto glass beads by placing 25 ml of beads into a  
178 polyester/cotton blend sock, which was worn by BDS for 12 hours. Beads were cleaned  
179 after use by soaking in a solution of 10 % detergent (Micro 90 Cleaning Solution, Cole-  
180 Parmer, Vernon Hills, IL, USA) in D.I. water and sonicated for one hour. The beads were  
181 then thoroughly rinsed with D.I. water, dried, rinsed twice with acetone (ACS grade,  
182 Fisher Scientific, Pittsburg, PA, USA), and heated to 250 °C for 12 hours before reuse.

183 Differing from Sumner and Cardé (2022), the dish of beads was presented on a  
184 15-cm high metal stand in the center of the tunnel, 55 cm upwind of the release cage.  
185 This ensured that compounds emanating from the beads were detectable by the

186 mosquitoes in their release cage. Assays were run and recorded with video for 6 minutes,  
187 commencing with the opening of the release cage. Disposable nitrile gloves were always  
188 worn by the experimenter to prevent contamination with skin odors.

189

## 190 **Treatment Strategy**

191

192 We presented the mosquitoes with clean beads, a low dose blend of 5  $\mu\text{g}$  each of  
193 ketoglutaric acid (KGA) (2-Keto-glutaric acid 97 %, TCI, Tokyo, Japan), and lactic acid  
194 (LA) (L-lactic acid 85-90 % in water, Honeywell Fluka, Charlotte, NC, USA) (based on  
195 Bello and Cardé 2022), a blend of 50  $\mu\text{g}$  each of lactic and ketoglutaric acids, and skin  
196 odor-treated beads by being worn in a sock. All four treatments were tested in the  
197 presence and absence of a turbulent 4 % plume of  $\text{CO}_2$  (Table 1).

198 To confirm the blend was not eliciting mosquito landing solely due to its lactic  
199 acid content, we also tested 50  $\mu\text{g}$  of LA alone and the blend of 50  $\mu\text{g}$  each of both  
200 compounds in a series of one-choice assays with  $\text{CO}_2$ . Five mosquitoes were used in each  
201 replicate of these assays (Table 1), which enabled a five-fold reduction in the number of  
202 assays for these treatments. The potential number of landings was not lowered but criteria  
203 such as time to takeoff and time from takeoff to first landing had their sample sizes  
204 reduced five-fold.

205

## 206 **Data Acquisition**

207

208 Video files were observed, and behavior was scored with BORIS v.5.1.0 (Friard and  
209 Gamba 2016). All videos were viewed and scored from the release time until 6 minutes  
210 elapsed. The observer recorded release and takeoff as “point” events, whereas landing



211 was scored as a “state” event starting with the landing on the beads and ending with the  
212 takeoff from the beads.

213 Video flight tracking was performed using EthoVision XT v.9.0 (Noldus  
214 Information Technology, Wageningen, The Netherlands). Raw numeric data were  
215 exported and used in statistical analysis. For data obtained with EthoVision XT, tracking  
216 commenced at takeoff and continued until the individual landed on the beads or remained  
217 in the upwind section of the wind tunnel, and was therefore indistinguishable, for  $\geq 30$   
218 seconds.

219

## 220 **Statistical Analysis**

221

222 All data manipulation and statistical tests were conducted using R v.3.5.0 (R Core Team  
223 2013) in RStudio v.1.1.463 (RStudio Team 2020).

## 224 ***Landing Observations***

225

226 The proportion of trials with at least one landing were compared across all treatments  
227 with a Fisher Exact test followed by pairwise Fisher Exact tests with Benjamini-  
228 Hochberg correction to reduce the false discovery rate. This method considers all the  
229 treatments to be completely independent of each other.

230

231 All other tests of manual landing observation data were conducted with  
232 generalized linear models (GLMs). A matrix was manually constructed with the  
233 independent variable data of each of the treatment combinations. It contained binary  
234 values for skin odor and CO<sub>2</sub> as well as a values of 0, 1, or 10 for the dose of the lactic  
235 and ketoglutaric acid blend. Instead of considering all treatments as independent, as the  
236 Fisher Exact test does, the GLMs used this information about the relationships among the  
237 treatments. In particular, the models treat the different doses of the blend as different

237 values of the same independent variable. The GLMs show which treatments were  
238 significantly correlated with whichever behavioral outcome was tested. This allowed us  
239 to determine which treatments were correlated. If we had relied on testing differences  
240 among treatment combinations, we would have potentially masked the importance of  
241 some cues. Significant correlations, unlike significant differences, do not translate  
242 directly to graphs of whole data sets. Therefore, instead of visually clear asterisks, the  
243 outputs of the GLMs are solely listed in the figure captions.

244         First, a GLM was used to compare the number of trials with at least one landing.  
245 This test of the same data examined with the Fisher tests allows comparison across  
246 methods. The treatment matrix was used again when comparing the: number of mosquito  
247 landings on beads per trial, durations a mosquito remained after landing among the  
248 different treatments, latency (time from release to takeoff), and duration of flight from  
249 takeoff to first landing. For testing of repeated landings, trials with one landing were  
250 converted to arbitrarily small values. The data was root ten transformed to make the  
251 residuals acceptably close to normal.

## 252 *Flight Tracks*

253  
254 Kruskal-Wallis tests were used to contrast the mean distance of the mosquito from the  
255 beads every 1/15 of a second during flight track, the mean velocity of the mosquito  
256 during flight, the  $E_{\max}$  (track straightness) of the mosquito flight, and the proportion of  
257 time the mosquito spent heading ( $\pm 20^\circ$ ) towards the center of the beads. Spearman rank  
258 correlations were used to test effects.

259          $E_{\max}$  (a measure of straightness, 1 being a completely straight track) (trajr  
260 package, McLean and Skowron-Volponi 2018) was used as a measure of track sinuosity  
261 and was calculated (Cheung et al. 2007) using the X and Y coordinates of the subject at

262 each time point.  $E_{\max}$  is based on an iterated summing of the expected displacement. As  
263 the shortest path between two points is a straight line, a high  $E_{\max}$  represents a straight  
264 path. This displacement does not necessarily correlate to distance from the beads. A  
265 mosquito flying a figure-eight over the beads would have a high  $E_{\max}$  and a low mean  
266 distance to the beads before landing, whereas a mosquito that flew straight to the beads  
267 would have a low  $E_{\max}$  and a low mean distance to the beads.

268

## 269 **Results**

270

### 271 **Takeoff**

272

273 The presence of CO<sub>2</sub> was the only treatment component that was positively correlated  
274 with the proportion of trials with mosquito takeoff (Est. = 0.447, P = 0.022) (Fig. 1).

275

### 276 **Latency from Release to Takeoff**

277

278

279 Among the treatments there were no significant differences in takeoff latencies. Although  
280 the 50 µg dose appears to elicit a significant decrease in take-off latency (P = 0.017,  
281 Coefficient = -0.3534), the residuals of the GLM (Gamma, link = log) were non-normal  
282 (KS P = 0.022), which means that the test cannot be used in this case (Fig. 2). This  
283 distribution and link function produced the closest to normal residuals.

284

285

### 286 **Time From First Takeoff to First Landing**

287

288 Figure 3 shows the time from takeoff to the first landing on the beads. Skin odor (Est. = -  
289 1.88, P < 0.001) and lactic and ketoglutaric acids 50 µg (Est. = -1.061, P = 0.026) reduced

290 the time mosquitoes took to first reach and land on the beads. The presence of CO<sub>2</sub> was  
291 not correlated with duration of flight from takeoff to first landing ( $P = 0.139$ ).

292

### 293 **Proportion of Trials with at Least One Landing**

294

295

296 While skin odor with or without supplemental CO<sub>2</sub> elicited the numerically highest  
297 proportion of trials with one or more landings on the odor-treated beads, it was not  
298 significantly different from the proportion of trials with lactic and ketoglutaric acids 50  
299 µg in the presence or absence of CO<sub>2</sub> that elicited one or more landings (Fisher Exact  
300 Test, adjusted  $P = 0.402$ ) (Fig. 4).

301 Only the presence of skin odor (GLM, Est. = 2.88,  $P < 0.001$ ) and both doses of  
302 the blend of lactic and ketoglutaric acids 50 µg (GLM, Est. = 2.434,  $P < 0.001$ ) and 5 µg  
303 (GLM, Est. = 1.192,  $P = 0.029$ ), were positively correlated with the probability of a  
304 mosquito landing at least once during a trial in the wind tunnel.

305

306

### 307 **Repeat Landings**

308

309 Figure 5 shows the number of repeat landings, per trial by treatment, among trials with at  
310 least one landing. The presence of skin odor (Est. = 0.3238,  $P = 0.0199$ ) and the high  
311 dose blend, 50 µg each, of lactic and ketoglutaric acids (Est. = 0.3244,  $P = 0.0311$ ) were  
312 positively correlated with the landings by a single mosquito per trial (Fig. 5).

313

### 314 **Total Landings on Lactic Acid Alone or the Lactic and Ketoglutaric Acid Blend**

315

316 The number of landings on the 50  $\mu\text{g}$  each blend of lactic and ketoglutaric acids (12.2  
317 mean landings per trial, S.D. = 8.9) were significantly greater than those on lactic acid  
318 alone (5.4 mean landings per trial, S.D. = 6.5) (Kruskal-Wallace,  $P = 0.046$ ) (Fig. 6). The  
319 time from takeoff to the first landing was significantly shorter between the two-  
320 component blend (mean = 57 seconds, S.D. = 49.4) and the lactic acid alone (mean = 115  
321 seconds, S.D. = 99.3) (Kruskal-Wallace,  $P = 0.039$ ).

322

### 323 **Duration of Landing**

324

325 Figure 7 provides the time within each trial that a single mosquito spent on the beads.  
326 The skin odor treatment (Est. = 1.626,  $P < 0.001$ ), both doses of the blend of lactic and  
327 ketoglutaric acids, 5  $\mu\text{g}$  (Est. = 0.979,  $P = 0.028$ ), and 50  $\mu\text{g}$  (Est. = 1.207,  $P = 0.004$ )  
328 were positively correlated with the duration of landing time of the mosquito (Fig. 7). The  
329 presence of  $\text{CO}_2$  was not correlated with duration of landing time. Additionally,  
330 mosquitoes were observed sticking their proboscises on the beads coated with 50  $\mu\text{g}$  each  
331 of lactic and ketoglutaric acids, in the presence of  $\text{CO}_2$ , in a manner resembling probing  
332 behavior.

333

### 334 **Analysis of Flight Tracks from Takeoff to First Landing**

335

336 Among the treatments there were no differences in the mean distance of insects from the  
337 beads during flight in the wind tunnel ( $\chi^2 = 298$ ,  $df = 298$ ,  $P = 0.49$ ). Selected flight  
338 tracks are shown in Fig. 8. Across all treatments, the mean ( $\pm$  SE) distance (mm) from the  
339 center of the beads during a mosquito flight was 214.15 mm ( $\pm 5.47$ ). This mean distance  
340 from the beads was negatively correlated with whether an individual landed on the beads  
341 ( $\rho = -0.36$ ,  $P < 0.001$ ).

342           There were no differences in the mean flight velocity (mm/s) of insects during  
343 flight in the wind tunnel among treatments ( $\chi^2 = 298$ ,  $df = 298$ ,  $P = 0.49$ ), nor did velocity  
344 of an individual significantly correlate with whether that individual landed on the beads  
345 or not ( $\rho = -0.12$ ,  $P = 0.05$ ). Across all treatments, the mean ( $\pm$  SE) velocity (mm/s) of  
346 mosquito flight in the wind tunnel was 193.15 mm ( $\pm$  3.67).

347           There were no differences in the proportion of time an insect spent heading ( $\pm$   
348  $20^\circ$ ) toward the center of the beads during flight in the wind tunnel among treatments ( $\chi^2$   
349  $= 289.36$ ,  $df = 288$ ,  $P = 0.47$ ), nor did this proportion of time significantly correlate with  
350 whether that individual landed on the beads or not ( $\rho = 0.01$ ,  $P = 0.83$ ). Across all  
351 treatments, the mean ( $\pm$  SE) proportion of the time a flying mosquito spent heading  
352 towards the center of the beads ( $\pm 20^\circ$ ) was 0.16 ( $\pm$  0.0039).

353           The  $E_{\max}$  (track straightness; 1 = completely straight track) of insect tracks during  
354 flight in the wind tunnel did not differ among treatments ( $\chi^2 = 298$ ,  $df = 298$ ,  $P = 0.49$ ),  
355 nor did the  $E_{\max}$  of an individual significantly correlate with whether that individual  
356 landed on the beads or not ( $\rho = 0.05$ ,  $P = 0.44$ ). Across all treatments the mean ( $\pm$  SE)  
357  $E_{\max}$  of mosquito flight in the wind tunnel was 0.35 ( $\pm$  0.01).

358

359 **Discussion**

360

361 The two-component blend of lactic acid and ketoglutaric acid developed by Bello and  
362 Cardé (2022) elicited upwind flight and landing. The proportion of *Ae. aegypti* that  
363 landed at least once on an upwind odor source of the “high dose” (50 µg of each) of the  
364 blend was similar to the proportion that landed on human a source of man odor.  
365 Unsurprisingly, the presence of CO<sub>2</sub> also increased the proportion of landings, given the  
366 known role of CO<sub>2</sub> in sensitizing mosquitoes to human skin odors (Dekker et al. 2005)  
367 and eliciting upwind flight (Kennedy 1940). Individual humans vary in their intrinsic  
368 attractiveness to mosquitoes, and some of this variation is likely attributable to the  
369 quantitative differences among individuals in their emission of lactic acid and  
370 ketoglutaric acid (Thurmon and Ottenstein 1952; Delgado-Povedano et al. 2020).

371 Skin odor and the higher dose of the blend of lactic acid and ketoglutaric acid (50  
372 µg), induced rapid orientation and landing on the beads and comparable numbers of  
373 repeat landings per individual mosquito. This suggests that this blend elicited the same  
374 persistence in mosquito landing behavior as human skin odor. The similarity between the  
375 behavioral activity elicited by the high dose and skin odor was further demonstrated in  
376 that the blend and skin odor were both correlated with the cumulative duration of landing  
377 on the beads. The number of repeat landings, their durations, or latency of first landing  
378 were not correlated with the presence of CO<sub>2</sub>. This is unsurprising, because in nature a  
379 mosquito landing on a skin odor source other than skin on the face would have likely  
380 exited the CO<sub>2</sub> plume (Dekker and Takken 1998). Because a long-duration landing  
381 reduces the available time for further landings, the numbers and durations of landings  
382 were inversely correlated in all trials.

383 The high-dose blend of lactic acid and ketoglutaric acid (50 µg) elicited more  
384 landings than lactic acid alone. We found that 50 µg rather than 5 µg of each component

385 of the blend elicited *Ae. aegypti* behaviors akin to skin odor in a wind tunnel. The 5  $\mu$ g  
386 dose was sufficient to induce numerous landings the cage assay which has little ambient  
387 air movement (Bello and Cardé, 2022). The need for a higher dose to evoke upwind  
388 source finding in a wind tunnel is consistent with the odor mixture being diluted by  
389 turbulent diffusion of the wind-borne plume as it is carried downwind.

390 Carbon dioxide was positively correlated with the probability of takeoff. It was  
391 not correlated with the proportion of trials with a landing within the subset of trials with  
392 mosquito take off. Our findings support that CO<sub>2</sub> elicits takeoff in *Ae. aegypti* females but  
393 does not act as a landing cue. This is consistent with the sequential-distance model of  
394 mosquito host seeking (Gillies 1980; Cardé and Gibson 2010; van Breugel et al. 2015;  
395 Cardé 2015). In this paradigm a host seeking mosquito takes off and flies upwind in a  
396 plume of CO<sub>2</sub> before encountering other cues. The mosquito is then able to detect visual  
397 cues, host odors other than CO<sub>2</sub>, and finally heat from the host. There are physical limits  
398 to the distance at which visual and heat cues should be detectable to mosquitoes (Kahn et  
399 al. 1966; Muir et al. 1992).

400 Ketoglutaric acid is a component of the citric acid cycle (Wishart et al. 2018). It is  
401 found in fresh and dry sweat (Delgado-Povedano et al. 2020). It is not known how much  
402 ketoglutaric acid volatilizes from human skin. Lactic acid is released from human  
403 apocrine glands at a rate exceeding that of many non-human animals (Thurmon and  
404 Ottenstein 1952). Incubated sweat contains less lactic acid than fresh sweat, suggesting  
405 that most is produced endogenously (Braks and Takken 1999).

406 Lactic acid has been a controversial candidate as a mosquito attractant (Acree et  
407 al. 1968; Smith et al. 1970); Steib et al. (2001) added lactic acid to human and non-  
408 human animal odor. The addition of lactic acid resulted in the non-human animals' odor  
409 drawing as many *Ae. aegypti* to its arm of the Y-tube as human odor. However, lactic



410 acid alone attracted only 19 % of the mosquitoes tested. Calf and goat odors with added  
411 lactic acid attracted 70 % of the *Ae. aegypti* tested.

412 Ketoglutaric acid may be one of the compounds Steib et al. (2001) and Geier et al.  
413 (2002) demonstrated existed but did not isolate. Our results corroborate those of Bello  
414 and Cardé (2022), that lactic acid is a necessary component but insufficient alone to elicit  
415 a rate of mosquito landing equal to that of a blend of human odor compounds.

416 The time to takeoff was surprisingly similar across treatments. Even across those  
417 with and without CO<sub>2</sub> the differences were not as large as we would have expected. We  
418 suspect that the release, while conducted with care, may have mechanically disturbed the  
419 mosquitoes enough to influence takeoff. A short latency to takeoff, however, may be an  
420 intrinsic character of *Ae. aegypti*. Cilek et al. (2004) described this mosquito as  
421 opportunistic or exhibiting “aggressive biting” and found that time to biting after landing  
422 averaged  $9.8 \pm 0.3$  s (as opposed to *Culex quinquefasciatus*, which averaged  $41.0 \pm 1.1$   
423 s). The test of five mosquitoes at a time with the two-component blend and lactic acid  
424 alone was intended to determine if the blend was better at eliciting landing than lactic  
425 acid alone. The blend elicited more landings and those mosquitoes landed more quickly  
426 than to lactic acid alone.

427 The lack of statistical differences in flight racks among treatments was  
428 unexpected, as there are large differences in the landing propensities among treatments. It  
429 may be that such tracks are inherently “messy,” and they do not differ in flight  
430 characteristics in our assay or in our method of analysis.

431 Skin odor elicited longer landing durations than either dose of the synthetic lure.  
432 This may be in part due to the different suite of cues available after the mosquitoes  
433 contacted the beads. Mosquitoes have express gustatory receptors on their tarsi (Sparks et  
434 al. 2013). Along with chemoreceptors on the labellum (Saveer et al. 2018), receptors on

435 the tarsi mean that after landing a mosquito may bring chemoreceptors into direct contact  
436 with host cues. These may include non-volatile chemicals such as amino acids. Further  
437 research, possibly with a cage-landing assay, will be needed to identify possible post-  
438 landing cues.

439           Current mosquito traps and lures, including the widely deployed BG Sentinel,  
440 have low trapping efficiency (actually captured after being lured to the trap's vicinity)  
441 and require a fan (Amos et al. 2020 a,b; Amos and Cardé 2022). By using compounds  
442 that elicit landing, it might be feasible to lure the mosquitoes directly into traps. This  
443 would boost trap efficiency and perhaps allow the development of traps without fans.  
444 We counted the number of repeat landings. If a lure in a trap elicits repeated landing  
445 attempt, it would provide multiple opportunities for capture.

446           Many other compounds also are reported to be attractive to *Ae aegypti* mosquitoes  
447 (Coutinho-Abreu et al. 2021; Dormont et al. 2021) and should be evaluated to determine  
448 if any of these add to the attractiveness of the blend of lactic and ketoglutaric acids.  
449 Among these are hexanoic acid, a known attractant of *Ae. aegypti* (Carlson et al. 1973;  
450 Williams et al. 2006; Owino et al. 2015), and ammonia (Steib et al. 2001). While known  
451 as an attractant of *Anopheles* rather than *Aedes* mosquitoes, 2-oxopentanoic acid, as well  
452 as straight-chain carboxylic acids of various lengths (Healy and Copeland 2000; Healy et  
453 al. 2002) should be evaluated, although carboxylic acids and short-chain aldehydes can  
454 be repellent to *Ae. aegypti* (Logan et al. 2008; Owino et al. 2015). To avoid specious  
455 interpretations of which odors mediate natural attraction to human hosts, it will be  
456 important to release odors at rates and ratios closely mimicking those that are naturally  
457 emitted (Cardé 2022).

458

459 **Conclusion**

460

461 A blend of lactic and ketoglutaric acids discovered by Bello and Cardé (2022) elicits

462 upwind flight and landing of *Ae. aegypti* in a wind tunnel, with and without supplemental

463 CO<sub>2</sub>. The effectiveness of this blend without supplemental CO<sub>2</sub> makes this combination a

464 candidate for use in mosquito traps. Ketoglutaric acid may be one of the compounds

465 present in animal odors that when supplemented with lactic acid are highly attractive to

466 anthropophilic mosquitoes.

467

468

469 **Acknowledgments**

470 We are grateful to Dr. ES Lacey for experimental advice and assistance with rearing. Drs.

471 AC Gerry and JG Miller provided useful comments on an early version of this

472 manuscript. Dr. E Sarro provided statistical guidance.

473 **Funding**

474 We acknowledge funding from the Pacific Southwest Regional Center of Excellence for

475 Vector-Borne Diseases funded by the U.S. Centers for Disease Control and Prevention

476 (Cooperative Agreement 1U01CK000516).

477 **Data Availability** [GitHub link to follow](#).

478 **Code Availability** [GitHub link to follow](#).

479 **Conflict of Interest** The authors declare that they have no conflicts of interest.

480 **Ethics Approval** Not applicable.

481 **Consent to Participate** Not applicable.

482 **Consent for Publication** Not applicable.

483 **Open Access**

484 **Authors' Contributions** BDS and RTC designed the experiments, BDS carried out these

485 trials and analyzed our findings. BAA analyzed the flight racks. JB aided in selection of

486 treatments. BDS and RTC wrote the paper.

487

488 **References**

489

490 Acree F Jr, Turner RB, Gouck HK, Beroza M, Smith N (1968) L-Lactic acid-a mosquito  
491 attractant isolated from humans. *Science* 161:1346-1347

492

493 Amos BA, Cardé RT (2022) Verifying the efficiency of the Biogents Sentinel trap in the  
494 field and investigating microclimatic influences on responding *Aedes aegypti*  
495 behavior. *J Vect Ecol* 47:166-170

496

497 Amos, BA, Ritchie SA, Cardé RT (2020a) Attraction versus capture II: efficiency of the  
498 BG-Sentinel trap under semifield conditions and characterizing response  
499 behaviors of male *Aedes aegypti* (Diptera: Culicidae). *J Med Entomol* 57:1-11

500 Amos BA, Staunton KM, Ritchie SA, Cardé RT (2020b) Attraction versus capture:  
501 efficiency of BG-Sentinel trap under semi-field conditions and characterizing  
502 response behaviors for female *Aedes aegypti* (Diptera: Culicidae). *J Med Entomol*  
503 57:884-892

504 Bello JE, Cardé RT (2022) Compounds from human odor that induce landing and  
505 attraction in female yellow fever mosquitoes (*Aedes aegypti*). *Sci Rep* 12:15638  
506 <https://doi.org/10.1038/s41598-022-19254-w>

507

508 Bernier U, Kline D, Schreck C, Yost R, Barnard D (2002) Chemical analysis of human  
509 skin emanations: comparison of volatiles from humans that differ in attraction of  
510 *Aedes aegypti* (Diptera: Culicidae). *J Am Mosq Control Assoc* 18:186-195

511

512 Bhatt S, Gething PW, Brady OJ, Messina JP, Farlow AW, Moyes CL, Drake JM,  
513 Brownstein JS, Hoen AG, Sankoh O et al. (2013) The global distribution and  
514 burden of dengue. *Nature* 496:504-507

515

516 Braks MA, Takken W (1999) Incubated human sweat but not fresh sweat attracts the  
517 malaria mosquito *Anopheles gambiae sensu stricto*. *J Chem Ecol* 25:663-672

518 Cardé RT (2015) Multi-cue integration: how female mosquitoes locate a human host.  
519 *Curr Biol* 18:21-25

520 Cardé RT (2022) Wind tunnels and airflow-assays: methods for establishing the cues and  
521 orientation mechanisms that modulate female mosquito attraction to human hosts.  
522 *Cold Spring Harb Protoc* (in press)

523 Cardé RT, Gibson G (2010) Host finding by female mosquitoes: mechanisms of  
524 orientation to host odours and other cues. In: Takken W, Knols BGJ (eds)  
525 *Olfaction in Vector-Host Interactions*. Wageningen Academic Publishers,  
526 Wageningen, pp 115-140

527

- 528 Carlson DA, Smith N, Gouck HK, Godwin DR (1973) Yellowfever mosquitoes:  
529 compounds related to lactic acid that attract females. *J Econ Entomol* 66:329-331  
530
- 531 Cheung A, Zhang S, Stricker C, Srinivasan MV (2007) Animal navigation: the difficulty  
532 of moving in a straight line. *Biol Cybern* 97:47-61
- 533 Cilek JE, Petersen JL, Hallmon CE (2004) Comparative efficacy of IR3535 and deet as  
534 repellents against adult *Aedes aegypti* and *Culex quinquefasciatus*. *J Am Mosq*  
535 *Control Assoc* 20:299-304
- 536 Coutinho-Abreu IV, Riffell JA, Akbari OS (2022) Human attractive cues and mosquito  
537 host-seeking behavior. *Trends Parasitol* 38:246-264
- 538 Crawford JE, Alves JM, Palmer WJ, Day JP, Sylla M, Ramasamy R, Surendran SN,  
539 Black WC, Pain A, Jiggins FA (2017) Population genomics reveals that an  
540 anthropophilic population of *Aedes aegypti* mosquitoes in West Africa recently  
541 gave rise to American and Asian populations of this major disease vector. *BMC*  
542 *Biol* 15:16 10.1186/s12915-017-0351-0
- 543 Daykin PN, Kellog FE, Wright RH (1965) Host finding and repulsion of *Aedes aegypti*.  
544 *Can Entomol* 97:239-263
- 545 Dekker T, Takken W (1998) Differential responses of mosquito sibling species  
546 *Anopheles arabiensis* and *An. quadriannulatus* to carbon dioxide, a man or a calf.  
547 *Med Vet Entomol* 12:136-140
- 548 Dekker T, Takken W, Cardé RT (2001) Structure of host-odour plumes influences catch  
549 of *Anopheles gambiae* s.s. and *Aedes aegypti* in a dual-choice olfactometer.  
550 *Physiol Entomol* 26:124-134
- 551 Dekker T, Steib B, Cardé RT, Geier M (2002) L-lactic acid: a human-signifying host cue  
552 for the anthropophilic mosquito *Anopheles gambiae*. *Med Vet Entomol* 16:91-98
- 553 Dekker T, Geier M, Cardé RT (2005) Carbon dioxide instantly sensitizes female yellow  
554 fever mosquitoes to human skin odours. *J Exp Biol* 208:2963-2972
- 555 Delgado-Povedano, MM, Castillo-Peinado LS, Calderon-Santiago M, Luque de Castro  
556 MD, Priego-Capote F (2020) Dry sweat as sample for metabolomics analysis.  
557 *Talanta* 208:e120428
- 558 Dethier V, Browne BL, Smith CN (1960) The designation of chemicals in terms of the  
559 responses they elicit from insects. *J Econom Entomol* 53:134-136
- 560 Dormont L, Mulatier M, Carrasco D et al. (2021) Mosquito attractants. *J Chem Ecol*  
561 47:351-393
- 562 Friard O, Gamba M (2016) BORIS: a free, versatile open-source event-logging software  
563 for video/audio coding and live observations. *Methods Ecol Evol* 7:1324–1330

- 564 Geier, M, Bosch OJ, Boeckh J. (1999) Influence of odour plume structure on upwind flight  
565 of mosquitoes towards hosts. J Exp Biol 202:1639-1648
- 566 Geier M, Bosh O, Steib B, Rose A, Boeckh J (2002) Odour-guides host finding  
567 mosquitoes: identification of new attractants on human skin. In: Proc Int Conf  
568 Urban Pests, Regensburg, Germany. pp 37-46
- 569 Ghaninia M, Majeed S, Dekker T, Hill SR, Ignell R (2019) Hold your breath -  
570 Differential behavioral and sensory acuity of mosquitoes to acetone and carbon  
571 dioxide. PLoS One 14:e0226815
- 572 Gillies M (1980) The role of carbon dioxide in host-finding by mosquitoes (Diptera:  
573 Culicidae): a review. Bull Entomol Res 70:525-532
- 574 Gillies MT, Wilkes TJ (1970) A comparison of the range of attraction of animal baits and  
575 of carbon dioxide for some West African mosquitoes. Bull Entomol Res 59:441-  
576 456
- 577 Gloria-Soria A, Ayala D, Bheecarry A, Calderon-Arguedas O, Chadee DD et al. (2016)  
578 Global genetic diversity of *Aedes aegypti*. Mol Ecol 25:5377-5395
- 579 Healy T, Copland M (2000) Human sweat and 2-oxopentanoic acid elicit a landing  
580 response from *Anopheles gambiae*. Med Vet Entomol 14:195-200
- 581 Healy T, Copland M, Cork A, Przyborowska A, Halket J (2002) Landing responses of  
582 *Anopheles gambiae* elicited by oxocarboxylic acids. Med Vet Entomol 16:126-  
583 132
- 584 Huffaker CB, Back RC (1943) A study of methods of sampling mosquito populations. J  
585 Econ Entomol 36:561-569
- 586 Khan AA, Maibach HI, Strauss WG (1968) The role of convection currents in mosquito  
587 attraction to human skin. Mosq News 28:462-264
- 588 Kennedy JS (1940) The visual responses of flying mosquitoes. Proc Zool Soc Lond Ser A  
589 109:221-242
- 590 Kennedy JS (1977) Behaviorally discriminating assays of attractants and repellents. In:  
591 Shorey HH, McKelvey JJ (eds) Chemical control of insect behavior. Wiley, New  
592 York, pp 215-229
- 593 Lacey ES, Cardé RT (2011) Activation, orientation and landing of female *Culex*  
594 *quinquefasciatus* in response to carbon dioxide and odour from human feet: 3D  
595 flight analysis in a wind tunnel. Med Vet Entomol 25:94-103
- 596 Logan JG, Birkett MA, Clark SJ et al. (2008) Identification of human-derived volatile  
597 chemicals that interfere with attraction of *Aedes aegypti* mosquitoes. J Chem Ecol  
598 34:308

- 599 Macdonald G (1952) The objectives of residual insecticide campaigns. *Trans R Soc Trop*  
600 *Med Hyg* 46:227-235
- 601 McBride CS, Baier F, Omondi AB, Spitzer SA, Lutomiah J, Sang R, Ignell R, Vosshall  
602 LB (2014) Evolution of mosquito preference for humans linked to an odorant  
603 receptor. *Nature* 515:222-227
- 604 McLean DJ, Skowron-Volponi MA (2018) trajr: an R package for characterization of  
605 animal trajectories. *Ethology* 124:440-448
- 606 McMeniman CJ, Corfas RA, Matthews BJ, Ritchie SA, Vosshall LB (2014) Multimodal  
607 integration of carbon dioxide and other sensory cues drives mosquito attraction to  
608 humans. *Cell* 156:1060-1071
- 609 Muir LE, Thorne MJ, Kay BH (1992) *Aedes aegypti* (Diptera: Culicidae) vision: spectral  
610 sensitivity and other perceptual parameters of the female eye. *J Med Entomol*  
611 29:278-281
- 612 Owino EA, Sang R, Sole, CL, Pirk C, Nbogo C, Toroto B (2015) An improved odor bait  
613 for monitoring populations of *Aedes aegypti*-vectors of dengue and chikungunya  
614 viruses in Kenya. *Parasit Vectors* 8:253
- 615 Pinto MC, Campbell-Lendrum DH, Lozovei AL, Teodoro U, Davies CR (2001)  
616 Phlebotomine sandfly responses to carbon dioxide and human odour in the field.  
617 *Med Vet Entomol* 15:132-139
- 618 Powell JR, Gloria-Soria A, Kotsakiozi P (2018) Recent history of *Aedes aegypti*: Vector  
619 genomics and epidemiology records. *Bioscience* 68:854-860
- 620 Reed W, Carroll J, Agramonte A, Lazear JW (1900) The etiology of yellow fever—a  
621 preliminary note. *Public Health Pap Rep* 26:37-53
- 622 R Core Team (2013) R: A language and environment for statistical computing. R  
623 Foundation for Statistical Computing, Vienna. <http://www.R-project.org/>
- 624 RStudio Team (2020) RStudio: Integrated Development for R. RStudio, PBC, Boston,  
625 MA URL <http://www.rstudio.com/>
- 626 Saveer AM, Pitts RJ, Ferguson ST, Zwiebel LJ (2018) Characterization of chemosensory  
627 responses on the labellum of the malaria vector mosquito, *Anopheles coluzzii*. *Sci*  
628 *Rep* 8:5656 10.1038/s41598-018-23987-y
- 629 Schreck CE, Gouck HK, Posey KH (1972) The range of effectiveness and trapping  
630 efficiency of a plexiglas mosquito trap baited with carbon dioxide. *Mosq News*  
631 32:496–501



- 632 Scott TW, Chow E, Strickman D, Kittayapong P, Wirtz RA, Lorenz LH, Edman JD  
633 (1993) Blood-feeding patterns of *Aedes aegypti* (Diptera: Culicidae) collected in a  
634 rural Thai village. *J Med Entomol* 30:922-927
- 635 Smith CN, Smith N, Gouck HK, Weidhaas DE, Gilbert IH, Mayer MS, Smittle BJ,  
636 Hofbauer A (1970) L-lactic acid as a factor in the attraction of *Aedes aegypti*  
637 (Diptera: Culicidae) to human hosts. *Ann Entomol Soc Am* 63:760-770
- 638 Snow WF (1970) The effect of a reduction in expired carbon dioxide on the attractiveness  
639 of human subjects to mosquitoes *Bull Entomol Res* 60:43-48
- 640 Sparks JT, Vinyard BT, Dickens JC (2013) Gustatory receptor expression in the labella  
641 and tarsi of *Aedes aegypti*. *Insect Biochem Mol Biol* 43:1161–1171
- 642 Steib BM, Geier M, Boeckh J (2001) The effect of lactic acid on odour-related host  
643 preference of yellow fever mosquitoes. *Chem Senses* 26:523-528
- 644 Sumner BD, Cardé RT (2022) Valence of human-odor, visual, and heat cues inducing  
645 landing in female *Aedes aegypti* mosquitoes. *J Insect Behav* 35:31-43
- 646 Thurmon FM, Ottenstein B (1952) Studies on the chemistry of human perspiration with  
647 special reference to its lactic acid content. *J Invest Dermatol* 18:333-339
- 648 Torr S, Della Torre A, Calzetta M, Costantini C, Vale G (2008) Towards a fuller  
649 understanding of mosquito behaviour: use of electrocuting grids to compare the  
650 odour-orientated responses of *Anopheles arabiensis* and *An. quadriannulatus* in  
651 the field. *Med Vet Entomol* 22:93-108
- 652 van Breugel F, Riffell J, Fairhall A, Dickinson MH (2015) Mosquitoes use vision to  
653 associate odor plumes with thermal targets. *Curr Biol* 25:2123-2129
- 654 Williams CR, Bergbauer R, Geier M, Kline DL, Bernier UR, Russell RC, Ritchie SA  
655 (2006) Laboratory and field assessment of some kairomone blends for host-  
656 seeking *Aedes aegypti*. *J Am Mosq Control Assoc* 22:641-647
- 657 Wishart DS et al. (2018) HMDB 4.0: the human metabolome database for 2018. *Nucleic*  
658 *Acids Res* 46:608-617
- 659
- 660
- 661
- 662
- 663



664

665

666 **Table 1 Treatment Combinations for Wind Tunnel Assays with Female *Ae. aegypti***

| <b>Treatment</b>     | <b>CO<sub>2</sub></b> | <b>Assays</b> | <b>Assays with takeoff</b> | <b>Mosquitoes per assay</b> | <b>Total mosquitoes</b> |
|----------------------|-----------------------|---------------|----------------------------|-----------------------------|-------------------------|
| Clean beads          | No                    | 46            | 87%                        | 1                           | 46                      |
| Clean beads          | Yes                   | 32            | 88%                        | 1                           | 32                      |
| 5 µg each of LA+KGA  | No                    | 40            | 75%                        | 1                           | 40                      |
| 5 µg each of LA+KGA  | Yes                   | 39            | 90%                        | 1                           | 39                      |
| 50 µg each of LA+KGA | No                    | 32            | 88%                        | 1                           | 32                      |
| 50 µg each of LA+KGA | Yes                   | 39            | 100%                       | 1                           | 39                      |
| Skin odor            | No                    | 31            | 74%                        | 1                           | 31                      |
| Skin odor            | Yes                   | 29            | 83%                        | 1                           | 29                      |
| 50 µg each of LA+KGA | Yes                   | 12            | All had ≥ 1                | 5                           | 60                      |
| 50 µg LA only        | Yes                   | 12            | All had ≥ 1                | 5                           | 60                      |

667

668

669

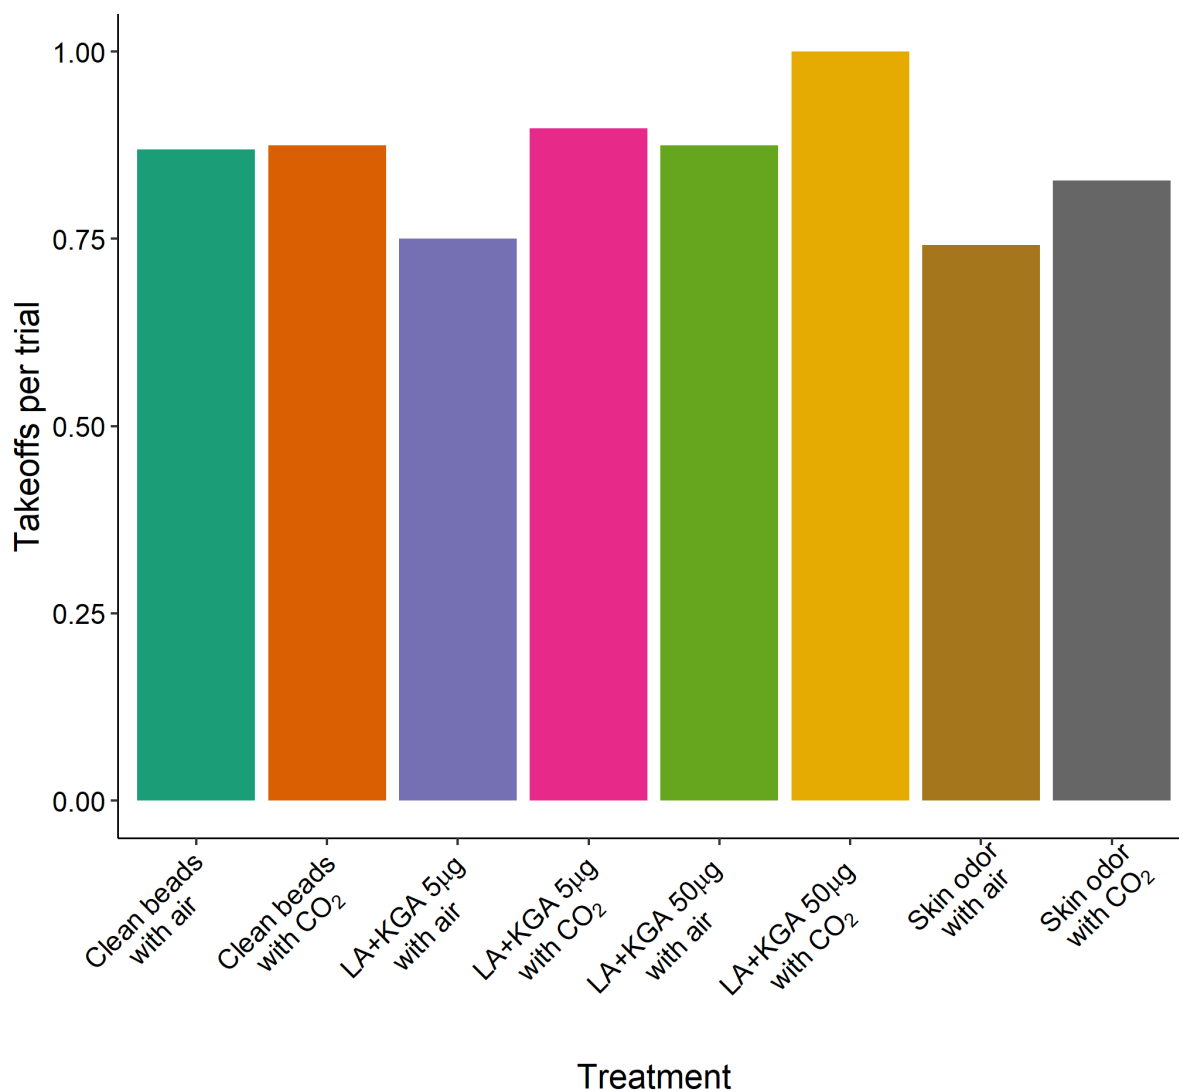

670

671

672

673 **Fig. 1** The proportions of trials in which *Aedes aegypti* initiated flight. Only the presence

674 of CO<sub>2</sub> was correlated with the proportion of trials with takeoff (GLM, binomial,

675 link = probit, Est. = 0.447, P = 0.022).

676

677

678

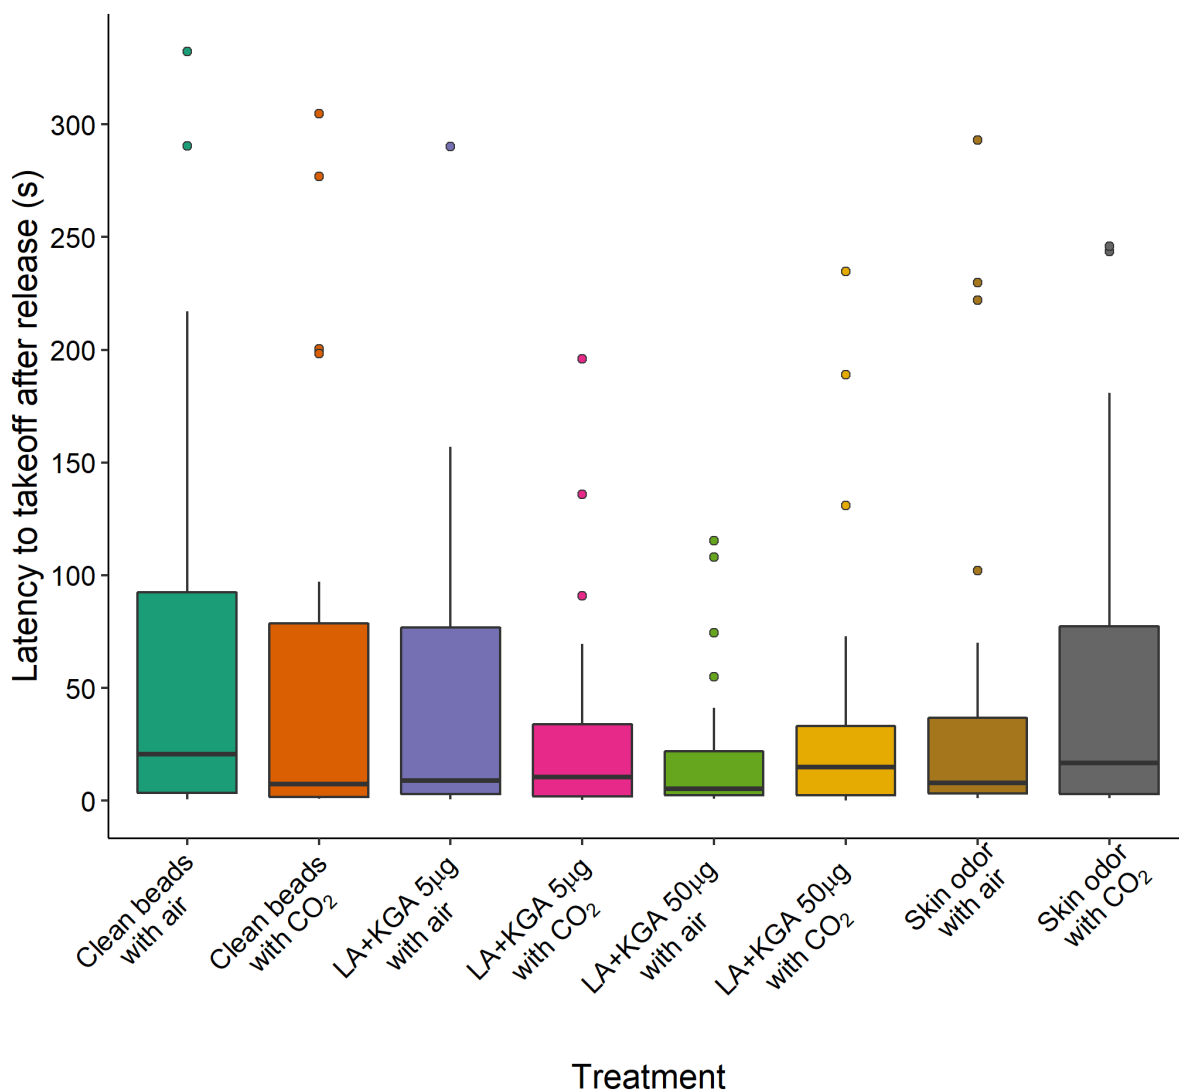

679

680 **Fig. 2** Latencies in *Aedes aegypti* of takeoff in seconds. While the high dose of the blend  
681 was significantly associated with a shorter latency (GLM, Est. = -0.3534, P =  
682 0.017), the residuals of the GLM (gamma, link = log), despite a square root  
683 transform of the data, were somewhat divergent from the normal distribution (KS  
684 P = 0.022).

685

686

687

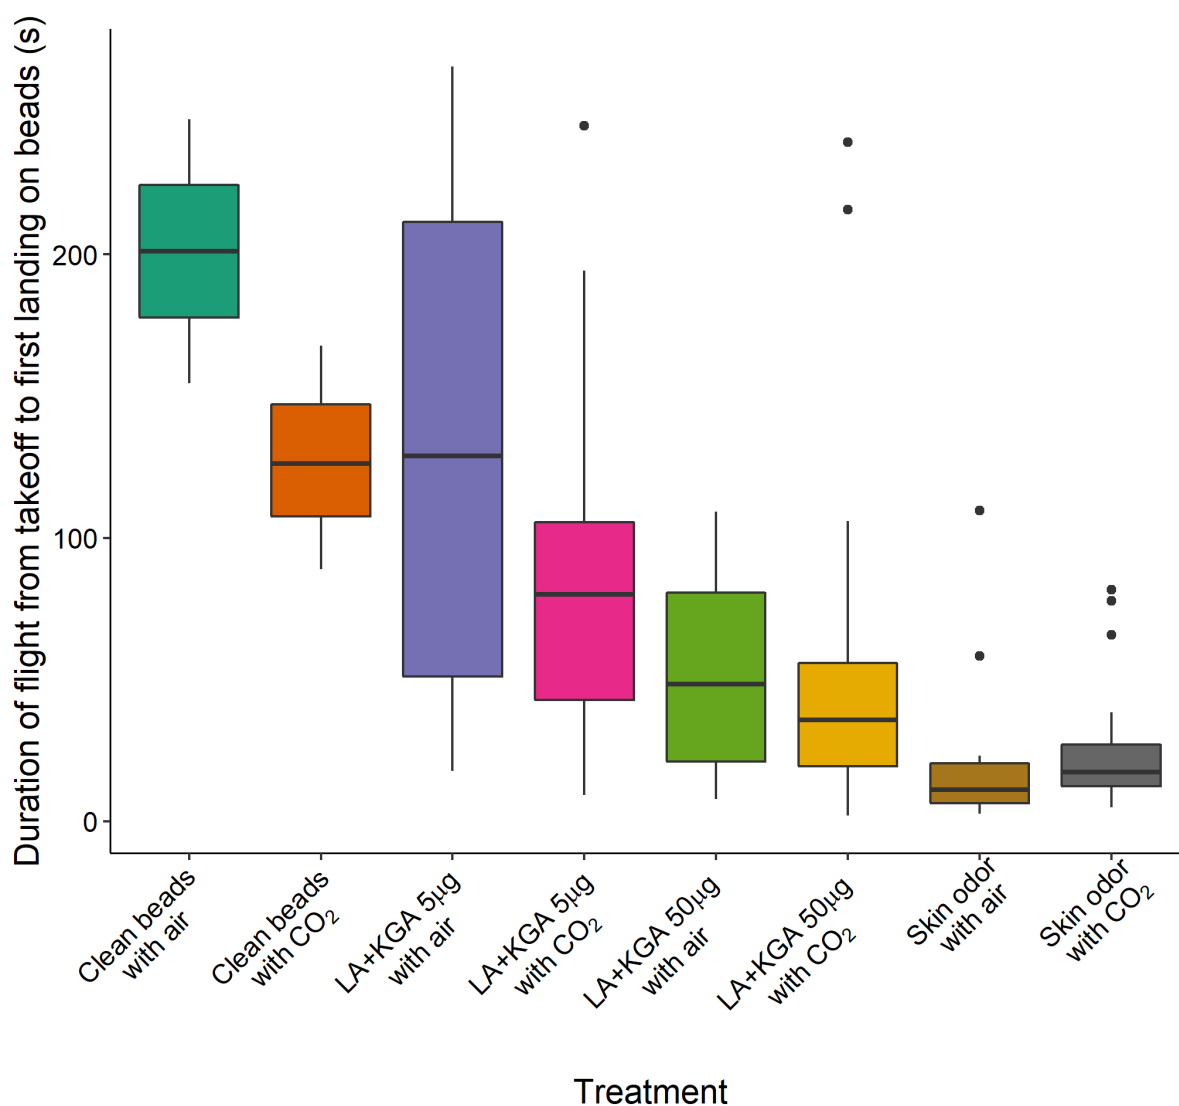

688

689 **Fig. 3** The durations of *Aedes aegypti* flight from takeoff to the first landing on beads in  
690 trials with at least one landing. The presence of skin odor (Est. = -1.88,  $P < 0.001$ )  
691 and the blend of 50 µg each of lactic and ketoglutaric acids (Est. = -1.061,  $P =$   
692 0.026) resulted in shorter flight times from takeoff to first landing. CO<sub>2</sub> was not  
693 correlated with flight duration.

694

695

696

697

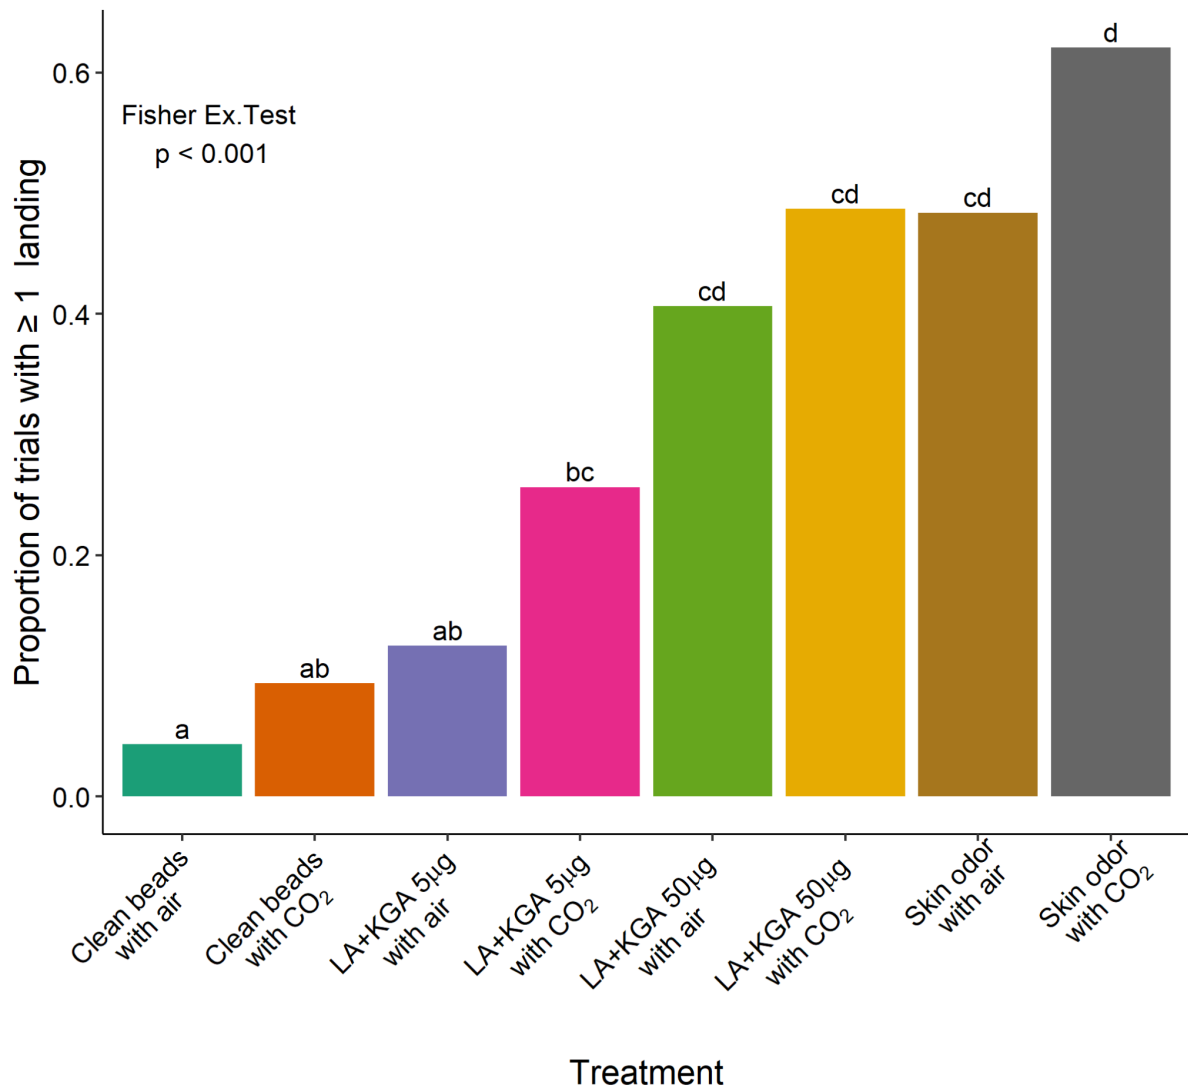

698  
699  
700

701 **Fig. 4** The proportion of trials in which *Aedes aegypti* landed more than once was tested  
702 with a Fisher Exact test followed by pairwise Fisher Exact tests; letters above  
703 columns show significant difference ( $P < 0.05$ ). The GLMs, informed of the  
704 relationships among the treatments, found that: the proportion of all trials with  $\geq 1$   
705 landing is correlated with: CO<sub>2</sub> (Est. = 0.578,  $P = 0.046$ ), skin odor (Est. = 2.88,  $P$   
706  $< 0.001$ ), the blend of 5 µg each of lactic and ketoglutaric acids (Est. = 1.192,  $P =$   
707 0.029), and the blend of 50 µg of each (Est. = 2.434,  $P < 0.001$ ).

708

709

710

711

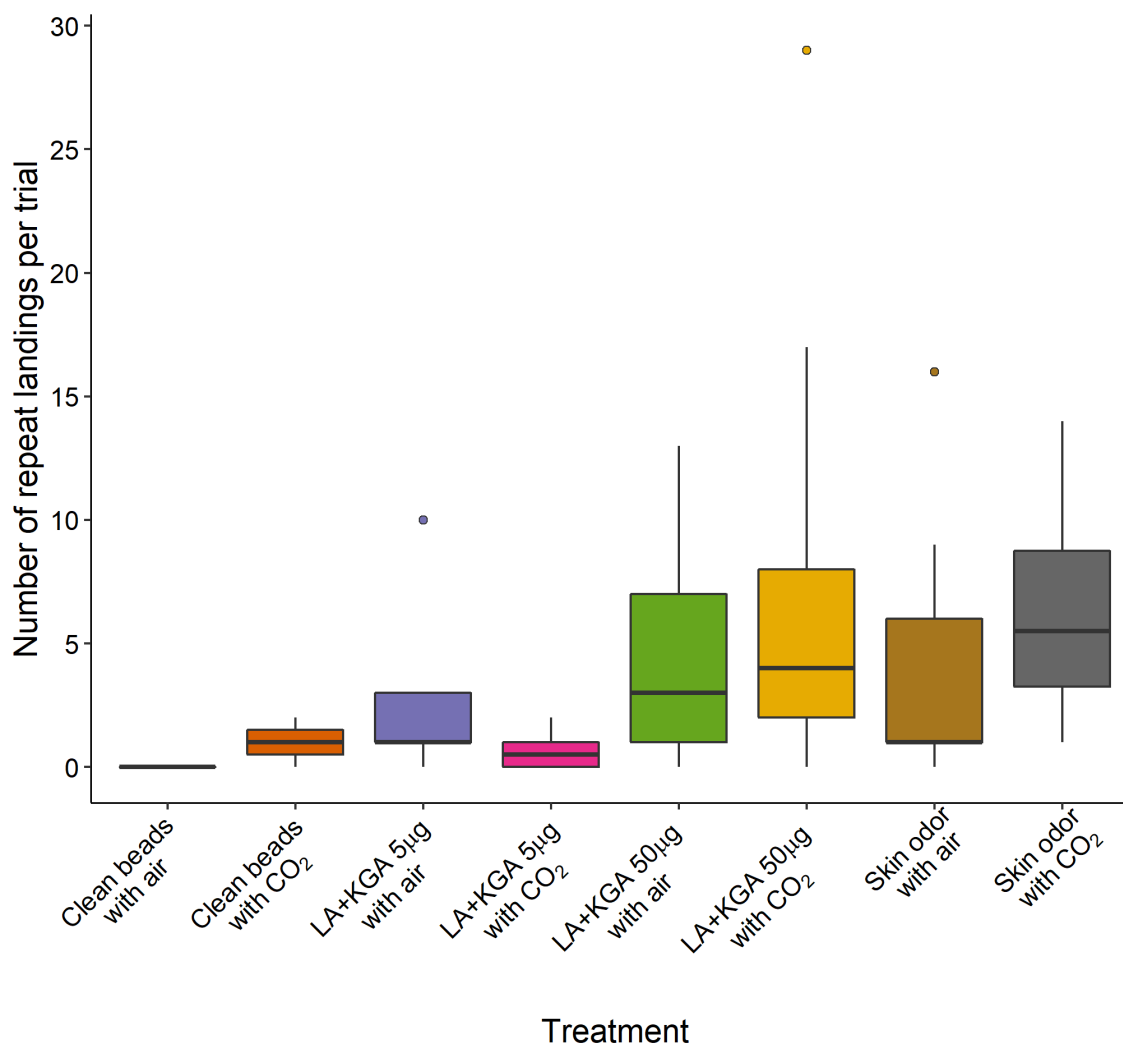

712

713 **Fig. 5** The number of repeat landings by female *Aedes aegypti* per trial among trials with  
714 at least one landing. Only skin odor (Est. = 0.3238, P = 0.0199) and 50 µg each of  
715 lactic and ketoglutaric acids (Est. = 0.3244, P = 0.0311) were correlated with the  
716 number of landings per trial.

717

718

719

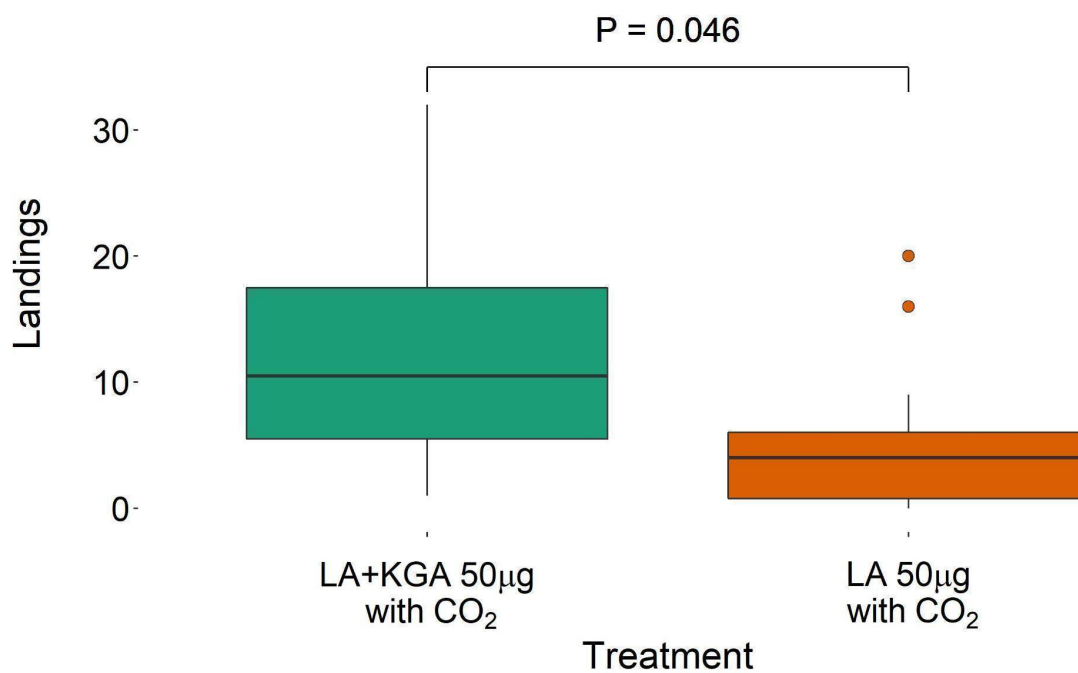

720

721 **Fig. 6** The total landings of *Aedes aegypti* by trial with the blend versus lactic acid alone.

722 The number of landings on the two-component blend was significantly different

723 than on lactic acid alone (Kruskal-Wallis, P = 0.046).

724

725

726



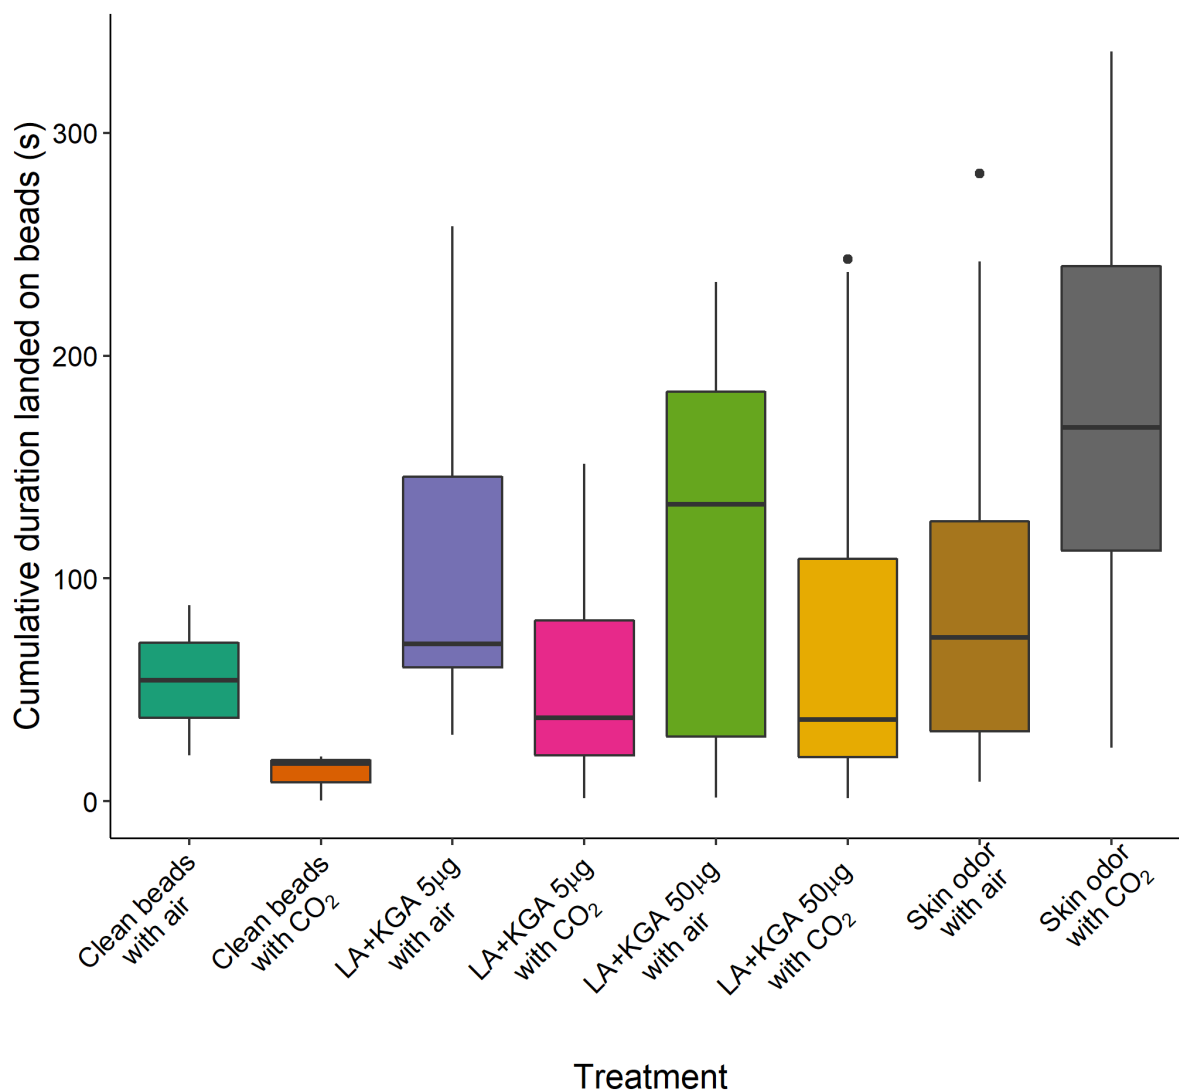

727

728 **Fig. 7** The cumulative duration of times female *Aedes aegypti* spent on beads, in trials

729 with  $\geq 1$  landing. Skin odor (Est. = 1.626,  $P < 0.001$ ), 5  $\mu\text{g}$  each of lactic and

730 ketoglutaric acids (Est. = 0.979,  $P = 0.028$ ), and the blend of 50  $\mu\text{g}$  of each (Est. =

731 1.207,  $P = 0.004$ ) were correlated with the duration mosquitoes remained landed.

732 CO<sub>2</sub> was not correlated with duration landed.

733

734

735 **Fig. 8A**

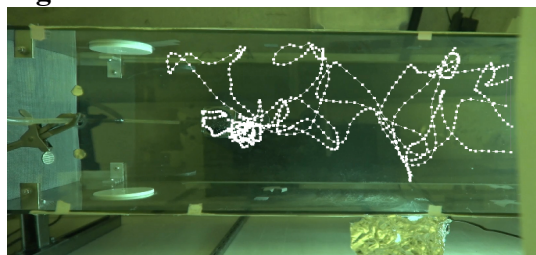

**Fig. 8B**

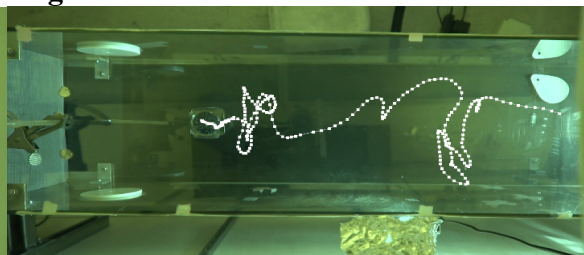

736

737 **Fig. 8C**

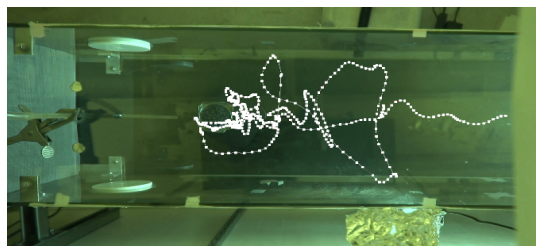

**Fig. 8D**

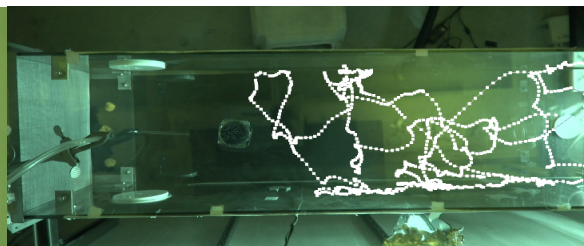

738

739 **Fig. 8** Top view of selected flight tracks of female *Aedes aegypti*, provided with CO<sub>2</sub>,  
740 responding to A) 50 µg of lactic and ketoglutaric acids; B) 5 µg of lactic and  
741 ketoglutaric acids; C) Skin odor; D) Clean beads. The mosquito did not land in  
742 the track shown in 8D. Airflow was left to right, and the mosquitoes were released  
743 on the right.
